# Supplementary material for: Does shrub encroachment reduce foraging grass abundance through plant-plant competition in Lesotho mountain rangelands?
Source: PeerJ. 2022 Aug 12;10:e13597. doi: 10.7717/peerj.13597 (PMC9377333; doi:10.7717/peerj.13597)
Supplement: Supplemental Information 1 — Data on vegetation, soil, and grazing status are provided for each site that we sampled. [file peerj-10-13597-s001.xlsx]

## Sheet: Sheet1
Site	GRASS index	Avg. No. Sh+gr coincidence	avg. mean Sh-Gr index	avg. no. Sh	avg. no. Gr	avg. no. B	avg. no. D	avg. no. H	avg. mean Sh cm	avg. mean Gr cm	Avg. % Sh	Avg. % Gr	Avg. % B	avg. % D	avg. % H	data	grazing	burned	deshrubbed	elevation (m)	aspect
1	286.281	4	-8.45675	5	16.7778	1.88889	0.111111	0.222222	7.94341	17.0631	25	83.8889	9.44444	0.555556	1.11111	Slomo	irregular	0	0	2186
2	75.9325	1.33333	-0.0666667	2.33333	13.6667	5	0	0.333333	2.5	5.55604	14	66	26	0	0	Slomo	heavy	0	0	2186
3	374.734	2.22222	-0.997354	3.22222	16.3333	0	0	0	17.3111	22.9429	16.1111	81.6667	0	0	0	Slomo	none	0	0	2149	90
4	247.19	0.428571	-0.285714	1	8.28571	6.42857	4.14286	0.142857	7.14286	29.8333	5	41.4286	32.1429	20.7143	0.714286	Colin	irregular	0	0	2128	90
5	400.649	3.5	-9.93333	3.75	12.5	0	0	0	26.5833	32.0519	18.75	62.5	0	0	0	Colin	irregular	0	0	2128	90
6	33.1667	1	1.375	5	4	0	0	0	13.0167	8.29167	25	20	0	0	0	Colin	regular	0	0	2096	90
7	169.152	0	0	2	6.5	7.75	0.5	0.25	8.05	26.0234	10	32.5	38.75	2.5	1.25	Colin	irregular	0	0	2096	90
8	125.351	0.33	0.666667	0.333333	7.66667	2.66667	3.33333	6	5	16.3502	1.66667	38.3333	13.3333	16.6667	30	Colin	spring	1	1	2709	225
9	156.404	1.16667	-1.27778	1.16667	9.33333	3	4.33333	3.33333	12.2778	16.7575	5.83333	46.6667	15	21.6667	16.6667	Colin	spring	0	1	2650	225
10	353.735	6.66667	1.53929	6.66667	14.3333	0.333333	2.66667	2.66667	28.069	24.6792	33.3333	71.6667	1.66667	13.3333	13.3333	Colin	irregular	0	1	2604	225
11	402.648	1.75	2.625	2.25	11	0.125	5.75	2.5	16.9988	36.6043	11.25	55	0.625	28.75	12.5	Colin	none	0	0	2997	0
12	109.016	2	2.08333	3.16667	7.33333	8.83333	1.5	1.16667	12.2833	14.8659	15.8333	36.6667	44.1667	7.5	5.83333	Colin	spring	0	1	2729	90
13	101.298	6.5	10.4602	7.5	11.5	4	2.5	1	20.2315	8.80856	37.5	57.5	20	12.5	5	Colin	regular	0	0	2761	270
14	86.3088	0.666667	1.08333	0.666667	7.66667	5.16667	3.83333	3.33333	4.27778	11.2577	3.33333	38.3333	25.8333	19.1667	16.6667	Colin	regular	0	1	2770	270
15	175.782	3.33333	5.51905	3.66667	11.3333	3.33333	4.16667	0.833333	17.1042	15.5102	18.3333	56.6667	16.6667	20.8333	4.16667	Colin	spring	0	1	2730	90
16	94.912	2.16667	5.65873	2.16667	10.6667	2.83333	2.66667	3.66667	10.4236	8.898	10.8333	53.3333	14.1667	13.3333	18.3333	Colin	spring	0	1	2550	270
17	31.9153	4.16667	15.2806	7	5.5	9.5	1	1.16667	18.5558	5.80278	35	27.5	47.5	5	5.83333	Colin	regular	1	0	2640	45
18	25.7942	0	0	0	10.3333	4	4.33333	1.33333	0	2.49621	0	51.6667	20	21.6667	6.66667	Colin	heavy	0	0	2160	90
19	176.662	0	-0.1875	3.66667	11.6667	4.16667	2.16667	2	6.75354	15.1424	18.3333	58.3333	20.8333	10.8333	10	Colin	regular	0	0	2961	90
