# Supplementary material for: Does shrub encroachment reduce foraging grass abundance through plant-plant competition in Lesotho mountain rangelands?
Source: PeerJ. 2022 Aug 12;10:e13597. doi: 10.7717/peerj.13597 (PMC9377333; doi:10.7717/peerj.13597)
Supplement: Supplemental Information 2 — Data are presented on the co-presence of grasses and shrubs in relation to plant height and grazing status. [file peerj-10-13597-s002.xlsx]

## Sheet: Sheet1
Site 1	Airstrip, Mokhotlong	DATA: Slomo	Irregular grazing	2019-01-11 11:30:00	2186 m	aspect 0	rainednight of 9-10 JAN
																											no. Sh	no. Gr	no. B	no. D	no. H
Q		1	2	3	4	5	6	7	8	9	10	11	12	13	14	15	16	17	18	19	20	No. Sh+gr coincidence	mean Sh-Gr index	No. Sh+B	No. Sh+D	No. Sh+H	% Sh	% Gr	% B	% D	% H	mean Sh cm	mean Gr cm
1	Shrubs						10							14					9			3	-9.33333	0	0	0	3	19	1	0	0	9	26.5
	Grasses	23	41	22	30	16	30	49	31	14	25	20	16	19	31	20	18	42	12		41
	other																			B							15	95	5	0	0
Shr-gr							-20							-5					-3
2	Shrubs				12				11											15		3	-0.333333	0	0	0	3	12	8	0	0	10.25	14.0833
	Grasses				11	15		11	14	16	5	10	12					20	10	14	31
	other	B	B	B			B							B	B	B	B										15	60	40	0	0
Shr-gr					1				-3											1
3	Shrubs									10											12	1	-20	0	0	0	2	16	3	0	0	7.66667	14.7333
	Grasses	36	15	10	12	21	11		17	22	17	10		15	25	18	8		17	3
	other							B					B					B									10	80	15	0	0
Shr-gr										-20
4	Shrubs																					0		0	0	0	0	19	1	0	0	0	18.6667
	Grasses	38	20	28	15	29	26	18	12	34	15	17	13	11	16	15	9	22		13	23
	other																		B								0	95	5	0	0
Shr-gr
5	Shrubs	19	9		8	15	13	11	5	17	10	11		12	15	11	4	13	11		5	12	-1.91667	0	0	0	17	15	0	0	0	10.7059	12.1333
	Grasses			5		12			6	11	13	18	9	17	17	4	13	18	24	5	10
	other																										85	75	0	0	0
Shr-gr						3			-1	6	-3	-7		-3	-3	-3	-3	-3	-3		-3
6	Shrubs																					0		0	0	0	0	16	2	0	2	0	12.125
	Grasses			4	30			5	6	5	17	24	8	5	24	11	11	17	4	19	4
	other	B	H			B	H																				0	80	10	0	10
Shr-gr
7	Shrubs	11	15			13	20			15	20	20										7	-16.8571	0	0	0	7	20	0	0	0	15.7143	23.8421
	Grasses	23	41	38	9	14	59	39	33	17	27	51	40	14	17	7	9	20	5	8	5
	other																										35	100	0	0	0
Shr-gr		-12	-26			-1	-39			-2	-7	-31
8	Shrubs																					0		0	0	0	0	19	1	0	0	0	11.5556
	Grasses	18	18	19	17	5	18	13	6	9	13		14	9	11	10	4	14	9	9	10
	other											B															0	95	5	0	0
Shr-gr
9	Shrubs	26	28	19	20		14	16		14	17	22			16		12			26	22	10	-2.3	0	0	0	13	15	1	1	0	18.1538	19.9286
	Grasses	19	25				14	41	13	31	14			21	20	18	17	10	12	21	22
	other					B							D														65	75	5	5	0
Shr-gr		7	3				0	-25		-7	3				-4		-5			5	0
MEANS																						4	-8.45675	0	0	0	5	16.7778	1.88889	0.111111	0.222222	7.94341	17.0631
																											25	83.8889	9.44444	0.555556	1.11111

## Sheet: Sheet2
Site 2	Outside Airstrip, Mokhotlong	DATA: Slomo	Heavy grazing	2019-01-11	2186 m	aspect 0	rained night of 9-10 JAN
																											no. Sh	no. Gr	no. B	no. D	no. H
Q		1	2	3	4	5	6	7	8	9	10	11	12	13	14	15	16	17	18	19	20	No. Sh+gr coincidence	mean Sh-Gr index	No. Sh+B	No. Sh+D	No. Sh+H	% Sh	% Gr	% B	% D	% H	mean Sh cm	mean Gr cm
1	Shrubs																					0	0	0	0	0	0	17	3	0	0	0	5.5625
	Grasses	6	6	7	4	3	4	6	11	7	6	5	4	6	6			4		5	5
	other															B	B		B								0	85	15	0	0
Shr-gr
2	Shrubs								6				6			6						1	-1	0	0	0	3	9	9	0	0	4.75	6.625
	Grasses	4				6	7			5		5	7					13	4	6
	other		B	B	B			B			B			B	B		B				B						15	45	45	0	0
Shr-gr													-1
3	Shrubs		7			5			5	9			8		7		11				5	6	0.666667	0	0	0	8	13	5	0	0	7	6.07692
	Grasses			7		4	5	4	8	8		9			4	5	8	6		5	6
	other	B			B						B			B					B								40	65	25	0	0
Shr-gr						1			-3	1					3		3				-1
4	Shrubs								4			4	4									1	0	0	0	0	3	14	3	0	0	3.25	5.38462
	Grasses	5	5	7	4	4	8		4		6			5	6	6	4	5		6
	other							B		B									B								15	70	15	0	0
Shr-gr									0
5	Shrubs																					0	0	0	0	0	0	13	6	0	0	0	5.15385
	Grasses		5	B	6		6	6	5	3		6				4	6	5	4	6	5
	other	B				B					B		B	B	B												0	65	30	0	0
Shr-gr
6	Shrubs																					0		0	0	0	0	16	4	0	2	0	4.53333
	Grasses	5	5	4	4	5	5	6	4		3		4		5	5	6	4		4	4
	other									B		B		B					B
Shr-gr
7	Shrubs
	Grasses
	other
Shr-gr
8	Shrubs
	Grasses
	other
Shr-gr
9	Shrubs
	Grasses
	other
Shr-gr
MEANS																						1.33333	-0.0666667	0	0	0	2.33333	13.6667	5	0	0.333333	2.5	5.55604
																											14	66	26	0	0

## Sheet: Sheet3
Site 3	Cemetary Mokhotlong	DATA: Slomo	No grazing	2019-01-11 13:55:00	2149 m	aspect E facing	rainednight of 9-10 JAN
																											no. Sh	no. Gr	no. B	no. D	no. H
Q		1	2	3	4	5	6	7	8	9	10	11	12	13	14	15	16	17	18	19	20	No. Sh+gr coincidence	mean Sh-Gr index	No. Sh+B	No. Sh+D	No. Sh+H	% Sh	% Gr	% B	% D	% H	mean Sh cm	mean Gr cm
1	Shrubs																					0	0	0	0	0	0	19	0	0	0	0	21.5789
	Grasses	24	24	32	20		32	19	13	10	16	13	24	23	30	30	28	32	19	10	11
	other					D																					0	95	0	0	0
Shr-gr
2	Shrubs																			10		1	-8	0	0	0	1	20	0	0	0	10	32
	Grasses	48	45	38	40	25	25	25	21	32	33	27	25	38	43	39	28	55	18	18	17
	other																										5	100	0	0	0
Shr-gr																				-8
3	Shrubs	12									13		16	18	16		12			21		7	-1.14286	0	0	0	7	20	0	0	0	15.4286	18.2
	Grasses	10	11	26	46	10	11	12	24	6	12	28	28	10	12	11	27	18	29	17	16
	other																										35	100	0	0	0
Shr-gr		2									1		-12	8	4		-15			4
4	Shrubs				55				51			18	38			21			31	21		6	15.1667	0	0	0	7	19	0	0	0	33.5714	22.4737
	Grasses	35	38	16	20	21	13	22	21	33	18	14	26	27	28	14	15	29		18	19
	other																										35	95	0	0	0
Shr-gr					35				30			4	12			7				3
5	Shrubs										46											1	10	0	0	0	1	20	0	0	0	46	29.15
	Grasses	32	31	25	35	23	30	16	25	29	36	25	30	21	29	30	36	16	35	14	65
	other																										5	100	0	0	0
Shr-gr											10
6	Shrubs		10															24				1	-15	0	0	0	2	10	0	0	0	17	21.9
	Grasses	17	25	7		37	29		16	30	20		16							22
	other				B			B				B		B	B	B	B		B		D						10	50	0	0	0
Shr-gr			-15
7	Shrubs	11	13		15	14	17		18		13			9		8			10			4	-10	0	0	0	10	10	0	0	0	12.8	22.9
	Grasses			22	28	21				26	26		28		21			22	17	18
	other							B				B					B				B						50	50	0	0	0
Shr-gr					-13	-7					-13								-7
8	Shrubs	21																				0	0	0	0	0	1	9	0	0	0	21	15.3333
	Grasses			13	14								11	10	18		19		15	14	24
	other		B			B	B	D	D	D	D	D				B		D									5	45	0	0	0
Shr-gr
9	Shrubs																					0	0	0	0	0	0	20	0	0	0	0	22.95
	Grasses	21	21	32	10	60	17	27	14	20	23	20	30	20	19	21	24	19	16	14	31
	other																										0	100	0	0	0
Shr-gr
MEANS																						2.22222	-0.997354	0	0	0	3.22222	16.3333	0	0	0	17.3111	22.9429
																											16.1111	81.6667	0	0	0

## Sheet: Sheet4
Site 4	Behind FTC, Mokhotlong	DATA: Colin	Irregular grazing	2019-01-13	2128 m	aspect E facing	rainednight of 9-10 JAN
																											no. Sh	no. Gr	no. B	no. D	no. H
Q		1	2	3	4	5	6	7	8	9	10	11	12	13	14	15	16	17	18	19	20	No. Sh+gr coincidence	mean Sh-Gr index	No. Sh+B	No. Sh+D	No. Sh+H	% Sh	% Gr	% B	% D	% H	mean Sh cm	mean Gr cm
1	Shrubs																					0	0	0	0	0	0	3	11	4	1	0	36
	Grasses			40				50									18
	other	B	D		B	B	B		D	B		B	B	B	B	B		D	H	B	D						0	15	55	20	5
Shr-gr
2	Shrubs																					0	0	0	0	0	0	6	12	3	0	0	22.3333
	Grasses	9			26			29	19								26	25
	other		D	B		B	B			D	B	B	B	B	B	B			B	B	B						0	30	60	15	0
Shr-gr
3	Shrubs											18		18								0	0	0	0	0	2	5	9	3	0	18	39
	Grasses		34				27						39					29		66
	other	B		D	B	D		B	B	B	B				B	B	B		D								10	25	45	15	0
Shr-gr
4	Shrubs																					0	0	0	0	0	0	11	3	6	0	0	20.8182
	Grasses	37	19	17	17				20	15						22	17	20		17	28
	other					D	B	D			D	D	B	D	D				B								0	55	15	30	0
Shr-gr
5	Shrubs								9										17			1	-2	0	0	0	2	7	8	3	0	13	24.1429
	Grasses	23		30			14						26				40		19	17
	other		B		B	D		B		B	B	D		B	D	B		B									10	35	40	15	0
Shr-gr																			-2
6	Shrubs																					0	0	0	0	0	0	13	0	6	0	0	38
	Grasses	50	26	46	44		31	54	51	27	34				27	29			43	32
	other					D						D	D	D			D	D									0	65	0	30	0
Shr-gr
7	Shrubs	23						13	21													2	0	0	0	0	3	13	2	4	0	19	28.5385
	Grasses	13			58	58	13	21	23		15	16		14		12	45	13	70
	other		B	D						D			B		D					D							15	65	10	20	0
Shr-gr		10						-8	-2
8	Shrubs
	Grasses
	other
Shr-gr
9	Shrubs
	Grasses
	other
Shr-gr
MEANS																						0.428571	-0.285714	0	0	0	1	8.28571	6.42857	4.14286	0.142857	7.14286	29.8333
																											5	41.4286	32.1429	20.7143	0.714286

## Sheet: Sheet5
Site 5	Across fence, behind FTC, Mokhotlong	DATA: Colin	Irregular grazing	2019-01-13 11:30:00	2128 m	aspect E facing	rainednight of 9-10 JAN
																											no. Sh	no. Gr	no. B	no. D	no. H
Q		1	2	3	4	5	6	7	8	9	10	11	12	13	14	15	16	17	18	19	20	No. Sh+gr coincidence	mean Sh-Gr index	No. Sh+B	No. Sh+D	No. Sh+H	% Sh	% Gr	% B	% D	% H	mean Sh cm	mean Gr cm
1	Shrubs								37	31			23		14		25			37		6	-9.33333	0	0	0	6	13	0	0	0	27.8333	32.3846
	Grasses	75		19	16		16		35	35		9	39	39	9		51	24		54
	other		D			B		D			D					D			B		D						30	65	0	0	0
Shr-gr									2	-4			-16		5		-26			-17
2	Shrubs			16	10																	2	-27	0	0	0	2	14	0	0	0	13	36.5
	Grasses			34	46		20		38	49	26	30	36	36		65	27	32	39	33
	other	D	D			D		D							D						B						10	70	0	0	0
Shr-gr				-18	-36
3	Shrubs	33															24					1	-5	0	0	0	2	10	0	0	0	28.5	26.4
	Grasses	38	40		28	22	22	30	20			17						28	19
	other			H						D	D		D	D	H	D				D							10	50	0	0	0
Shr-gr		-5
4	Shrubs					19		45	45	49	27											5	1.6	0	0	0	5	13	0	0	0	37	32.9231
	Grasses	36	29		19	17		20	66	41	33		47	39				40		13	28
	other			D			D					D			D	H	D		D								25	65	0	0	0
Shr-gr						2		25	-21	8	-6
5	Shrubs
	Grasses
	other
Shr-gr
6	Shrubs
	Grasses
	other
Shr-gr
7	Shrubs
	Grasses
	other
Shr-gr
8	Shrubs
	Grasses
	other
Shr-gr
9	Shrubs
	Grasses
	other
Shr-gr
MEANS																						3.5	-9.93333	0	0	0	3.75	12.5	0	0	0	26.5833	32.0519
																											18.75	62.5	0	0	0

## Sheet: Sheet6
Site 6	LDF area, Mokhotlong	DATA: Colin	Horse grazing	2019-01-14 11:30:00	2096 m	aspect E facing	rainednight of 9-10 JAN
																											no. Sh	no. Gr	no. B	no. D	no. H
Q		1	2	3	4	5	6	7	8	9	10	11	12	13	14	15	16	17	18	19	20	No. Sh+gr coincidence	mean Sh-Gr index	No. Sh+B	No. Sh+D	No. Sh+H	% Sh	% Gr	% B	% D	% H	mean Sh cm	mean Gr cm
1	Shrubs						22	21	24			20	24		20	19	22		14			4	5.5	0	0	0	9	12	0	0	0	20.6667	12.6667
	Grasses	9	16	8		8	12		7		6			16	32	12		20		6
	other				B					B											B						45	60	0	0	0
Shr-gr							10		17						-12	7
2	Shrubs										3											0	0	0	0	0	1	2	0	0	0	3	3.5
	Grasses				4										3
	other	B	D	B		H	D	B	D	D		B	D	B		B	B	B	H	B	B						5	10	0	0	0
Shr-gr
3	Shrubs													19	19	17		20			13	0	0	0	0	0	5	2	0	0	0	17.6	17
	Grasses			31									3
	other	B	H		B	B	B	H	D	B	B	D					D		B	B							25	10	0	0	0
Shr-gr
4	Shrubs	9								14					2			12			17	0	0	0	0	0	5	0	0	0	0	10.8	0
	Grasses
	other		D	B	B	B	H	D	D		D	B	B	D		D	D		D	B							25	0	0	0	0
Shr-gr
5	Shrubs
	Grasses
	other
Shr-gr
6	Shrubs
	Grasses
	other
Shr-gr
7	Shrubs
	Grasses
	other
Shr-gr
8	Shrubs
	Grasses
	other
Shr-gr
9	Shrubs
	Grasses
	other
Shr-gr
MEANS																						1	1.375	0	0	0	5	4	0	0	0	13.0167	8.29167
																											25	20	0	0	0

## Sheet: Sheet7
Site 7	FTC land next to LDF, Mokhotlong	DATA: Colin	Irregular grazing (sheep cattle horse donkey)	13/01/2019 :00	2096 m	aspect E facing	rainednight of 9-10 JAN
																											no. Sh	no. Gr	no. B	no. D	no. H
Q		1	2	3	4	5	6	7	8	9	10	11	12	13	14	15	16	17	18	19	20	No. Sh+gr coincidence	mean Sh-Gr index	No. Sh+B	No. Sh+D	No. Sh+H	% Sh	% Gr	% B	% D	% H	mean Sh cm	mean Gr cm
1	Shrubs		10	8		18																0	0	0	0	0	3	10	4	2	1	12	40.3
	Grasses	50						29	50	21	47	56	50	28	46					26
	other				D		B									D	H	B	B		B						15	50	20	10	5
Shr-gr
2	Shrubs				19	25							21							16	20	0	0	0	0	0	5	0	14	0	0	20.2	0
	Grasses
	other	B	B	B			B	B	B	B	B	B		D	B	B	B	B	B								25	0	70	0	0
Shr-gr
3	Shrubs																					0	0	0	0	0	0	9	7	0	0	0	31.2222
	Grasses			26	38	17	47	23				44			2		30	54
	other	B	B						B	B	D		D	D		D			B	B	B						0	45	35	0	0
Shr-gr
4	Shrubs																					0	0	0	0	0	0	7	6	0	0	0	32.5714
	Grasses	5		26		42							57	60				23	15
	other		B		D		D	B	D	B	B	D			D	D	B			D	B						0	35	30	0	0
Shr-gr
5	Shrubs
	Grasses
	other
Shr-gr
6	Shrubs
	Grasses
	other
Shr-gr
7	Shrubs
	Grasses
	other
Shr-gr
8	Shrubs
	Grasses
	other
Shr-gr
9	Shrubs
	Grasses
	other
Shr-gr
MEANS																						0	0	0	0	0	2	6.5	7.75	0.5	0.25	8.05	26.0234
																											10	32.5	38.75	2.5	1.25

## Sheet: Sheet8
Site 8	Lower Motserimeti	DATA: Colin	Burned 2014, deshrubbed after 2014, grazed 1 month per year in spring by cow, donkey, horse, sheep, goats	2019-01-16 11:30:00	2709 m	aspect S-W facing	rainednight of 9-10 JAN or maybe night of 15-16.
																											no. Sh	no. Gr	no. B	no. D	no. H
Q		1	2	3	4	5	6	7	8	9	10	11	12	13	14	15	16	17	18	19	20	No. Sh+gr coincidence	mean Sh-Gr index	No. Sh+B	No. Sh+D	No. Sh+H	% Sh	% Gr	% B	% D	% H	mean Sh cm	mean Gr cm
1	Shrubs																					0	0	0	0	0	0	11	0	6	3	0	25.2727
	Grasses	56			13				58	46	18				22		13	4	9	19	20
	other		D	D		D	H	H				D	D	D		H											0	55	0	30	15
Shr-gr
2	Shrubs							15														1	2	0	0	0	1	3	5	0	11	15	11.3333
	Grasses		15					13												6
	other	H		H	H	H	B		H	H	D	H	H	H	B	H	H	B	B		B						5	15	25	0	55
Shr-gr								2
3	Shrubs																					0	0	0	0	0	0	9	3	4	4	0	12.4444
	Grasses	11	24				13	6	6			34				7		7	4
	other			D	B	H				H	D		H	H	B		D			B	D						0	45	15	20	20
Shr-gr
4	Shrubs
	Grasses
	other
Shr-gr
5	Shrubs
	Grasses
	other
Shr-gr
6	Shrubs
	Grasses
	other
Shr-gr
7	Shrubs
	Grasses
	other
Shr-gr
8	Shrubs
	Grasses
	other
Shr-gr
9	Shrubs
	Grasses
	other
Shr-gr
MEANS																						0.33	0.666667	0	0	0	0.333333	7.66667	2.66667	3.33333	6	5	16.3502
																											1.66667	38.3333	13.3333	16.6667	30

## Sheet: Sheet9
Site 9	Lower Motserimeti	DATA: Colin	Unburned, deshrubbed in 2013, grazed 1 month in spring by cattle, horses, donkeys, sheep, goats	2019-01-16 12:00:00	2650 m	aspect SW	rainednight of 9-10 JAN or maybe 15-16
																											no. Sh	no. Gr	no. B	no. D	no. H
Q		1	2	3	4	5	6	7	8	9	10	11	12	13	14	15	16	17	18	19	20	No. Sh+gr coincidence	mean Sh-Gr index	No. Sh+B	No. Sh+D	No. Sh+H	% Sh	% Gr	% B	% D	% H	mean Sh cm	mean Gr cm
1	Shrubs					16				15			16									3	-1.66667	0	0	0	3	11	1	5	3	15.6667	17.3636
	Grasses	15		12	10	23			34	18	13	38	11	11						6
	other		D				D	H							B	D	D	H	H		D						15	55	5	25	15
Shr-gr						-7				-3			5
2	Shrubs																					0	0	0	0	0	0	9	4	3	4	0	16.3333
	Grasses					22		7	7	20		17	31	12		8					23
	other	H	D	H	D		B				D				B		B	B	H	H							0	45	20	15	20
Shr-gr
3	Shrubs						11															1	1	0	0	0	1	6	5	4	5	11	12.8333
	Grasses					10	10		8		24					16				9
	other	B	D	H	H			D		B		H	H	D	H		D	B	B		B						5	30	25	20	25
Shr-gr							1
4	Shrubs														14							1	2	0	0	0	1	8	5	3	4	14	16.75
	Grasses		12	31	26					20					12	13	8			12
	other	H				B	B	B	H		D	D	D	B				H	H		B						5	40	25	15	20
Shr-gr															2
5	Shrubs								16													1	1	0	0	0	1	13	2	4	1	16	17.1538
	Grasses	22	23	12	5		17		15			15	16	15	33		16	7		27
	other					D		D		H	D					D			B		B						5	65	10	20	5
Shr-gr									1
6	Shrubs										17											1	-10	0	0	0	1	9	1	7	3	17	20.1111
	Grasses				40	28	25				27	7			9	9	28				8
	other	D	H	D				D	D	D			D	B				D	H	H							5	45	5	35	15
Shr-gr											-10
7	Shrubs
	Grasses
	other
Shr-gr
8	Shrubs
	Grasses
	other
Shr-gr
9	Shrubs
	Grasses
	other
Shr-gr
MEANS																						1.16667	-1.27778	0	0	0	1.16667	9.33333	3	4.33333	3.33333	12.2778	16.7575
																											5.83333	46.6667	15	21.6667	16.6667

## Sheet: Sheet10
Site 10	Lower Motserimeti	DATA: Colin	Deshrubbed 2013, patch with little evidence of grazing.	16/01/2019 :00	2604 m	aspect SW	rainednight of 9-10 JAN or maybe 15-16
																											no. Sh	no. Gr	no. B	no. D	no. H
Q		1	2	3	4	5	6	7	8	9	10	11	12	13	14	15	16	17	18	19	20	No. Sh+gr coincidence	mean Sh-Gr index	No. Sh+B	No. Sh+D	No. Sh+H	% Sh	% Gr	% B	% D	% H	mean Sh cm	mean Gr cm
1	Shrubs				23	30							29	39					12			5	-10.4	0	0	0	5	15	0	2	3	26.6	33.9333
	Grasses	33	29	20	25	29		31	37			37	49	64	31			67	18	7	32
	other						H			D	H					H	D										25	75	0	10	15
Shr-gr					-2	1							-20	-25					-6
2	Shrubs		22					19					19			15	17			11	15	7	-1.85714	0	0	0	7	12	0	4	4	16.8571	17.9167
	Grasses		25	23	18	18		31	20				15			17	19		5	10	14
	other	H					D			H	D	H		H	D			D									35	60	0	20	20
Shr-gr			-3					-12					4			-2	-2			1	1
3	Shrubs		39	40	46	51	45						46							39	20	8	16.875	0	0	0	8	16	1	2	1	40.75	22.1875
	Grasses	25	38	20	28	50	15			12	26	20	22		18	12		10	41	5	13
	other							D	H					B			D										40	80	5	10	5
Shr-gr			1	20	18	1	30						24							34	7
4	Shrubs
	Grasses
	other
Shr-gr
5	Shrubs
	Grasses
	other
Shr-gr
6	Shrubs
	Grasses
	other
Shr-gr
7	Shrubs
	Grasses
	other
Shr-gr
8	Shrubs
	Grasses
	other
Shr-gr
9	Shrubs
	Grasses
	other
Shr-gr
MEANS																						6.66667	1.53929	0	0	0	6.66667	14.3333	0.333333	2.66667	2.66667	28.069	24.6792
																											33.3333	71.6667	1.66667	13.3333	13.3333

[truncated: 11 more sheets: Sheet11, Sheet12, Sheet13, Sheet14, Sheet15, Sheet16, Sheet17, Sheet18, Sheet19, copy paste sheet, Summary data]
